# Supplementary material
Source: MDPI journal article supplement (https://www.mdpi.com/2076-3417/7/12/1232)
Supplement: s1 [file s1]

1: %please add ``a" before Podded Propulsion Unmanned Surface Vehicle with Uncertainty of Model and Actuator Saturation.

Author reply: "a" was added before Podded Propulsion Unmanned Surface Vehicle.

2: % If this is an expanded version of a conference paper, please cite it here: enter the full citation of your conference paper, and add  $\dagger$  in the end of the title of this article.

Author reply: I don't have an expanded version of a conference paper.

3: % Please carefully check the accuracy of names and affiliations. Changes will not be possible after proofreading.

Author reply: There is no mistake in the authors' name.

4: MMG %please define

Author reply: MMG (Ship Manoeuvring Mathematical Model Group)

5: %The introduction should briefly place the study in a broad context and highlight why it is important. It should define the purpose of the work and its significance. The current state of the research field should be reviewed carefully and key publications cited. Please highlight controversial and diverging hypotheses when necessary. Finally, briefly mention the main aim of the work and highlight the principal conclusions. As far as possible, please keep the introduction comprehensible to scientists outside your particular field of research. Citing a journal paper `\cite{1}`. And now citing a book reference `\cite{2}`. Please use the command `\citep{1}` for the following MDPI journals, which use author-date citation: Administrative Sciences, Arts, Econometrics, Economies, Genealogy, Humanities, IJFS, JRFM, Laws, Religions, Risks, Social Sciences.

Author reply : In introduction, most of the references are in recent years. Meanwhile, the advantages of this article are introduced in introduction. So I don't think there's any need to make any changes here.

6: \item[(2)]  $\{y\}_e$  is equally divided into NB, NS, Z, PS and PB%please define these if they are abbreviations

Author reply: In fuzzy control, NB, NS and so on are conventional and do not need abbreviation.

7: \label{F3}%in the figure, please define PP

Author reply: podded propulsion (PP)

8: Fine tuning is necessary for an accuracy of, for example, 0.01%please carefully check the

corrections to this sentence.

Author reply: This sentence is deleted.

9: D. M. %please check the use of initials here

Author reply : This has been changed to “The work presented here was performed in collaboration among all authors. Dongdong Mu%please check the use of initials here .~designed, analyzed and wrote the paper. Guofeng Wang guided the full text. Yunsheng Fan conceived of the idea. Xiaojie Sun and Bingbing Qiu analyzed the data”.

10: \bibitem[Author1(year)]{26}

Fossen, T.I. Marine Control Systems: Guidance, Navigation and Control of Ships, Rigs and Underwater Vehicles. In {\em \hl{Marine Cybernetics}}; Trondheim, Norway, 2002. % Please add publisher.

Author reply: Fossen, T.I. Marine Control Systems: Guidance, Navigation and Control of Ships, Rigs and Underwater Vehicles. In {\em \hl{Marine Cybernetics}}; Springer, Trondheim, Norway, 2002.
